# Supplementary material
Source: HighWire-hosted journal article supplement (https://erj.ersjournals.com/content/55/3/1901419)
Supplement: inline-supplementary-material-1 [file inline-supplementary-material-1.pdf]

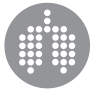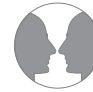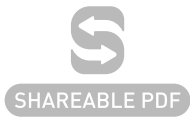

# Something is changing in adherence to CPAP therapy: real world data after 1 year of treatment in patients with obstructive sleep apnoea

Elisa Morrone<sup>1</sup>, Andrea Giordano<sup>2</sup>, Sonia Carli<sup>1</sup>, Dina Visca <sup>3</sup>, Fabio Rossato<sup>1</sup>, Massimo Godio<sup>1</sup>, Elena Paracchini<sup>1</sup>, Sabrina Rossi<sup>1</sup>, Bruno Balbi<sup>1</sup>, Carlo Sacco<sup>1</sup> and Alberto Braghiroli <sup>1</sup>

**Affiliations:** <sup>1</sup>Sleep Laboratory, Dept Pulmonary Rehabilitation, ICS Maugeri Spa SB, Scientific Institute of Veruno, Veruno, Italy. <sup>2</sup>Bioengineering Dept, ICS Maugeri Spa SB, Scientific Institute of Veruno, Veruno, Italy. <sup>3</sup>Dept Pulmonary Rehabilitation, ICS Maugeri Spa SB, Scientific Institute of Tradate, Tradate, Italy.

**Correspondence:** Alberto Braghiroli, Istituti Clinici Scientifici Maugeri IRCCS, Via Maugeri 4, 27100 Pavia, Italy. E-mail: [alberto.braghiroli@icsmaugeri.it](mailto:alberto.braghiroli@icsmaugeri.it)

@ERSpublications

**Adherence to CPAP therapy is effective when applying a standard protocol consisting of a diagnostic procedure, accurate pressure setting and mask choice, a group educational session on sleep disorders and 1-yr follow up visit** <http://bit.ly/352XPBH>

**Cite this article as:** Morrone E, Giordano A, Carli S, *et al.* Something is changing in adherence to CPAP therapy: real world data after 1 year of treatment in patients with obstructive sleep apnoea. *Eur Respir J* 2020; 55: 1901419 [<https://doi.org/10.1183/13993003.01419-2019>].

This single-page version can be shared freely online.

## *To the Editor:*

Obstructive sleep apnoea syndrome (OSA) is a common sleep disorder, affecting at least 24% of the male and 9% of the female population [1]. Despite progress in alternative treatment options, continuous positive airway pressure (CPAP) therapy is still the first-line treatment in moderate to severe OSA. The effectiveness of CPAP treatment is proportional to the usage: the greater the number of hours of CPAP use per night the greater the improvement in OSA symptoms, daytime sleepiness, quality of life, sleep architecture and blood pressure. Adherence to treatment, however, is the crucial issue: in many case series more than 50% of patients with OSA had interrupted treatment 1 year after the prescription [2].
